# Supplementary material for: Investigations on the development of MCM-41 as a potential mesoporous silica based reference material for the analysis of multi-textural properties
Source: Royal Society of Chemistry journal article supplement (doi:10.1039/c4ra11509k), 2014-12-16
Supplement: c4ra11509k1.pdf [file c4ra11509k1.pdf]

## Supplimentary Informations

### **Investigations on the development of MCM-41 as a potential mesoporous silica based reference material for the analysis of multi textural properties**

N. Sudheesh, Manu Vasudevan, Haresh M. Mody, Hari C. Bajaj, Ram S. Shukla\*

Discipline of Inorganic Materials and Catalysis, Council of Scientific and Industrial Research, Central Salt and Marine Chemicals Research Institute, G. B. Marg, Bhavnagar, Gujarat– 364 002, India.

**Table 1** Effect of aging on textural properties of glove box samples

| Month                              | Sample code        | BET SA, m <sup>2</sup> /g | Total PV, cm <sup>3</sup> /g | BJH adsorption PD, Å | Wall thickness, (Å) |
|------------------------------------|--------------------|---------------------------|------------------------------|----------------------|---------------------|
| Freshly Calcined sample (no aging) | SN2(1)             | 1023                      | 0.936                        | 27.60                | 17.02               |
|                                    | SN2(2)             | 1021                      | 0.895                        | 27.54                | 17.08               |
|                                    | SN2(3)             | 1026                      | 0.930                        | 27.50                | 17.12               |
|                                    | SN2(4)             | 1025                      | 0.986                        | 27.62                | 17.00               |
|                                    | Mean               | 1024                      | 0.937                        | 27.56                | 17.06               |
|                                    | Standard deviation | 2.2                       | 0.037                        | 0.055                | 0.055               |
| (2 months aging)                   | SN2-GB(1)          | 979                       | 0.937                        | 27.28                | 17.46               |
|                                    | SN2-GB(2)          | 1034                      | 1.030                        | 27.52                | 17.22               |
|                                    | SN2-GB(3)          | 1055                      | 1.077                        | 29.42                | 15.32               |
|                                    | Mean               | 1023                      | 1.015                        | 28.08                | 16.66               |
|                                    | Standard deviation | 39.2                      | 0.071                        | 1.172                | 1.172               |
| (4 months aging)                   | SN2-GB(1)          | 1036                      | 1.052                        | 27.64                | 16.64               |
|                                    | SN2-GB(2)          | 960                       | 0.982                        | 27.54                | 16.74               |
|                                    | SN2-GB(3)          | 1101                      | 1.017                        | 27.54                | 16.74               |
|                                    | Mean               | 1032                      | 1.017                        | 27.58                | 16.70               |
|                                    | Standard deviation | 70.6                      | 0.035                        | 0.058                | 0.058               |
| (6 months aging)                   | SN2-GB(1)          | 958                       | 0.929                        | 27.50                | 16.11               |
|                                    | SN2-GB(2)          | 1015                      | 1.015                        | 27.68                | 15.93               |
|                                    | SN2-GB(3)          | 951                       | 0.856                        | 25.52                | 18.09               |
|                                    | Mean               | 975                       | 0.934                        | 26.90                | 16.71               |
|                                    | Standard deviation | 35.1                      | 0.079                        | 1.198                | 1.198               |
| (8 months aging)                   | SN2-GB(1)          | 1057                      | 1.015                        | 27.63                | 17.11               |
|                                    | SN2-GB(2)          | 987                       | 0.897                        | 27.68                | 17.06               |
|                                    | SN2-GB(3)          | 985                       | 0.888                        | 27.47                | 17.27               |
|                                    | Mean               | 1009                      | 0.933                        | 27.59                | 17.15               |
|                                    | Standard deviation | 41.0                      | 0.070                        | 0.107                | 0.107               |
| (10 months aging)                  | SN2-GB(1)          | 1118                      | 1.084                        | 27.57                | 16.29               |
|                                    | SN2-GB(2)          | 1096                      | 1.036                        | 27.6                 | 16.26               |
|                                    | SN2-GB(3)          | 1083                      | 1.023                        | 27.59                | 16.27               |
|                                    | Mean               | 1099                      | 1.047                        | 27.58                | 16.28               |
|                                    | Standard deviation | 17.7                      | 0.032                        | 0.014                | 0.014               |
| (12 months aging)                  | SN2-GB(1)          | 1061                      | 1.043                        | 27.50                | 17.25               |
|                                    | SN2-GB(2)          | 1088                      | 1.04                         | 27.60                | 17.15               |
|                                    | SN2-GB(3)          | 1089                      | 1.039                        | 27.41                | 17.34               |
|                                    | Mean               | 1079                      | 1.040                        | 27.506               | 17.25               |
|                                    | Standard deviation | 15.9                      | 0.002                        | 0.094                | 0.094               |

**Table 2** Effect of aging on textural properties of atmospheric condition samples

| Month                              | Sample code        | BET SA, m <sup>2</sup> /g | Total PV, cm <sup>3</sup> /g | BJH adsorption PD, Å | Wall thickness, (Å) |
|------------------------------------|--------------------|---------------------------|------------------------------|----------------------|---------------------|
| Freshly Calcined sample (no aging) | SN2(1)             | 1023                      | 0.936                        | 27.60                | 17.02               |
|                                    | SN2(2)             | 1021                      | 0.895                        | 27.54                | 17.08               |
|                                    | SN2(3)             | 1026                      | 0.930                        | 27.5                 | 17.12               |
|                                    | SN2(4)             | 1025                      | 0.986                        | 27.62                | 17.00               |
|                                    | Mean               | 1024                      | 0.937                        | 27.56                | 17.06               |
|                                    | Standard deviation | 2.2                       | 0.037                        | 0.055                | 0.055               |
| (2 months aging)                   | SN2-AC(1)          | 1002                      | 0.979                        | 27.38                | 18.38               |
|                                    | SN2-AC(2)          | 1014                      | 0.967                        | 27.52                | 18.24               |
|                                    | SN2-AC(3)          | 1090                      | 1.051                        | 27.38                | 18.38               |
|                                    | Mean               | 1035                      | 0.999                        | 27.42                | 18.34               |
|                                    | Standard deviation | 47.7                      | 0.045                        | 0.081                | 0.081               |
| (4 months aging)                   | SN2-AC(1)          | 1032                      | 0.921                        | 27.60                | 15.84               |
|                                    | SN2-AC(2)          | 896                       | 0.872                        | 27.60                | 15.84               |
|                                    | SN2-AC(3)          | 1003                      | 0.915                        | 27.70                | 15.74               |
|                                    | Mean               | 977                       | 0.903                        | 27.64                | 15.80               |
|                                    | Standard deviation | 71.6                      | 0.026                        | 0.058                | 0.058               |
| (6 months aging)                   | SN2-AC(1)          | 1013                      | 0.972                        | 27.60                | 16.19               |
|                                    | SN2-AC(2)          | 981                       | 0.903                        | 27.54                | 16.25               |
|                                    | SN2-AC(3)          | 987                       | 0.909                        | 27.54                | 16.25               |
|                                    | Mean               | 994                       | 0.928                        | 27.56                | 16.23               |
|                                    | Standard deviation | 17.0                      | 0.038                        | 0.035                | 0.035               |
| (8 months aging)                   | SN2-AC(1)          | 1055                      | 0.960                        | 27.52                | 16.83               |
|                                    | SN2-AC(2)          | 1028                      | 0.943                        | 27.52                | 16.83               |
|                                    | SN2-AC(3)          | 1055                      | 0.910                        | 27.57                | 16.78               |
|                                    | Mean               | 1046                      | 0.938                        | 27.540               | 16.81               |
|                                    | Standard deviation | 15.6                      | 0.025                        | 0.032                | 0.032               |
| (10 months aging)                  | SN2-AC(1)          | 983                       | 0.827                        | 27.63                | 15.85               |
|                                    | SN2-AC(2)          | 1007                      | 0.851                        | 27.68                | 15.8                |
|                                    | SN2-AC(3)          | 1006                      | 0.849                        | 27.64                | 15.84               |
|                                    | Mean               | 998                       | 0.842                        | 27.65                | 15.83               |
|                                    | Standard deviation | 13.6                      | 0.013                        | 0.026                | 0.026               |
| (12 months aging)                  | SN2-AC(1)          | 1086                      | 1.030                        | 27.15                | 16.63               |
|                                    | SN2-AC(2)          | 1123                      | 1.091                        | 27.25                | 16.53               |
|                                    | SN2-AC(3)          | 1037                      | 0.962                        | 27.28                | 16.5                |
|                                    | Mean               | 1082                      | 1.027                        | 27.23                | 16.55               |
|                                    | Standard deviation | 43.1                      | 0.064                        | 0.070                | 0.070               |

**Table 3S** PXRD data of glove box samples analysed for one year

| Month                              | Parameter                         | d <sub>100</sub> | d <sub>110</sub> | d <sub>200</sub> | d <sub>210</sub> | Std. Dev. | Unit cell a <sub>0</sub> , (Å) |  |
|------------------------------------|-----------------------------------|------------------|------------------|------------------|------------------|-----------|--------------------------------|--|
| Freshly Calcined sample (no aging) | 2θ Experimental                   | 2.274            | 3.957            | 4.54             | 6.01             |           | 44.62                          |  |
|                                    | 2θ (d <sub>100</sub> ) Calculated | 2.274            | 2.284            | 2.27             | 2.271            | 0.0065    |                                |  |
|                                    | WA 2θ (d <sub>100</sub> )         | 2.275            |                  |                  |                  |           |                                |  |
|                                    | d Spacing experimental            | 38.81            | 22.31            | 19.43            | 14.7             |           |                                |  |
|                                    | d Spacing calculated              | 38.81            | 38.64            | 38.86            | 38.89            | 0.1113    |                                |  |
|                                    | d <sub>100</sub>                  | 38.80            |                  |                  |                  |           |                                |  |
|                                    | Intensity (cps)                   | 4460             | 538              | 328              | 120              |           |                                |  |
| (2 months aging)                   | 2θ Experimental                   | 2.286            | 3.95             | 4.51             | 5.897            |           | 44.74                          |  |
|                                    | 2θ (d <sub>100</sub> ) Calculated | 2.286            | 2.280            | 2.255            | 2.229            | 0.0262    |                                |  |
|                                    | WA 2θ (d <sub>100</sub> )         | 2.281            |                  |                  |                  |           |                                |  |
|                                    | d Spacing experimental            | 38.62            | 22.37            | 19.58            | 14.97            |           |                                |  |
|                                    | d Spacing calculated              | 38.62            | 38.75            | 39.16            | 39.61            | 0.4466    |                                |  |
|                                    | d <sub>100</sub>                  | 38.70            |                  |                  |                  |           |                                |  |
|                                    | Intensity (cps)                   | 2770             | 469              | 302              | 89               |           |                                |  |
| (4 months aging)                   | 2θ Experimental                   | 2.319            | 3.988            | 4.56             | 6.026            |           | 44.28                          |  |
|                                    | 2θ (d <sub>100</sub> ) Calculated | 2.319            | 2.302            | 2.28             | 2.278            | 0.0196    |                                |  |
|                                    | WA 2θ (d <sub>100</sub> )         | 2.313            |                  |                  |                  |           |                                |  |
|                                    | d Spacing experimental            | 38.07            | 22.14            | 19.36            | 14.65            |           |                                |  |
|                                    | d Spacing calculated              | 38.07            | 38.3476          | 38.72            | 38.76            | 0.3274    |                                |  |
|                                    | d <sub>100</sub>                  | 38.16            |                  |                  |                  |           |                                |  |
|                                    | Intensity (cps)                   | 3123             | 405              | 269              | 75               |           |                                |  |
| (6 months aging)                   | 2θ Experimental                   | 2.337            | 4.026            | 4.628            | 6.075            |           | 43.61                          |  |
|                                    | 2θ (d <sub>100</sub> ) Calculated | 2.337            | 2.324            | 2.314            | 2.296            | 0.0172    |                                |  |
|                                    | WA 2θ (d <sub>100</sub> )         | 2.333            |                  |                  |                  |           |                                |  |
|                                    | d Spacing experimental            | 37.77            | 21.93            | 19.08            | 14.54            |           |                                |  |
|                                    | d Spacing calculated              | 37.77            | 37.98            | 38.16            | 38.47            | 0.2956    |                                |  |
|                                    | d <sub>100</sub>                  | 37.83            |                  |                  |                  |           |                                |  |
|                                    | Intensity (cps)                   | 3571             | 452              | 284              | 94               |           |                                |  |
| (8 months aging)                   | 2θ Experimental                   | 2.278            | 3.935            | 4.529            | 5.927            |           | 44.74                          |  |
|                                    | 2θ (d <sub>100</sub> ) Calculated | 2.278            | 2.272            | 2.264            | 2.240            | 0.0165    |                                |  |
|                                    | WA 2θ (d <sub>100</sub> )         | 2.2756           |                  |                  |                  |           |                                |  |
|                                    | d Spacing experimental            | 38.75            | 22.44            | 19.49            | 14.9             |           |                                |  |
|                                    | d Spacing calculated              | 38.75            | 38.86            | 38.98            | 39.42            | 0.2934    |                                |  |
|                                    | d <sub>100</sub>                  | 38.7929          |                  |                  |                  |           |                                |  |
|                                    | Intensity (cps)                   | 2858             | 369              | 223              | 85               |           |                                |  |
| (10 months aging)                  | 2θ Experimental                   | 2.324            | 4.032            | 4.632            | 6.078            |           | 43.86                          |  |
|                                    | 2θ (d <sub>100</sub> ) Calculated | 2.324            | 2.327            | 2.316            | 2.297            | 0.0136    |                                |  |
|                                    | WA 2θ (d <sub>100</sub> )         | 2.32334          |                  |                  |                  |           |                                |  |
|                                    | d Spacing experimental            | 37.99            | 21.9             | 19.06            | 14.53            |           |                                |  |
|                                    | d Spacing calculated              | 37.99            | 37.93            | 38.12            | 38.44            | 0.2283    |                                |  |

|                   |                                          |          |       |       |       |        |       |
|-------------------|------------------------------------------|----------|-------|-------|-------|--------|-------|
|                   | WA d <sub>100</sub>                      | 38.00161 |       |       |       |        |       |
|                   | Intensity (cps)                          | 3434     | 447   | 283   | 85    |        |       |
| (12 months aging) | 2θ Experimental                          | 2.277    | 3.979 | 4.572 | 6     |        | 44.75 |
|                   | 2θ (d <sub>100</sub> ) Calculated        | 2.277    | 2.297 | 2.286 | 2.268 | 0.0126 |       |
|                   | WA 2θ (d <sub>100</sub> )                | 2.279513 |       |       |       |        |       |
|                   | d Spacing experimental                   | 38.76    | 22.19 | 19.31 | 14.72 |        |       |
|                   | d Spacing calculated<br>d <sub>100</sub> | 38.76    | 38.43 | 38.62 | 38.94 | 0.2164 |       |
|                   | WA d <sub>100</sub>                      | 38.72088 |       |       |       |        |       |
|                   | Intensity (cps)                          | 3032     | 402   | 247   | 96    |        |       |

PXRD conditions: 2θ = 1-7°, scan speed = 0.25, sampling width = 0.02, kV = 30, mA = 15, WA = weighted average value

**Table 4S** PXRD data of samples of atmospheric conditions analysed for one year

| Month                                 | Parameter                                | d <sub>100</sub> | d <sub>110</sub> | d <sub>200</sub> | d <sub>210</sub> | Std. Dev. | Unit cell<br>a <sub>0</sub> (Å) |  |
|---------------------------------------|------------------------------------------|------------------|------------------|------------------|------------------|-----------|---------------------------------|--|
| Freshly Calcined sample<br>(no aging) | 2θ Experimental                          | 2.274            | 3.957            | 4.54             | 6.01             |           | 44.62                           |  |
|                                       | 2θ (d <sub>100</sub> ) Calculated        | 2.274            | 2.284            | 2.27             | 2.271            | 0.0065    |                                 |  |
|                                       | WA 2θ (d <sub>100</sub> )                | 2.275            |                  |                  |                  |           |                                 |  |
|                                       | d spacing<br>Experimental                | 38.81            | 22.31            | 19.43            | 14.7             |           |                                 |  |
|                                       | d spacing Calculated<br>d <sub>100</sub> | 38.81            | 38.64            | 38.86            | 38.89            | 0.1113    |                                 |  |
|                                       | WA d <sub>100</sub>                      | 38.80            |                  |                  |                  |           |                                 |  |
|                                       | Intensity (cps)                          | 4460             | 538              | 328              | 120              |           |                                 |  |
| (2 months aging)                      | 2θ Experimental                          | 2.206            | 3.859            | 4.421            | 5.826            |           | 45.76                           |  |
|                                       | 2θ (d <sub>100</sub> ) Calculated        | 2.206            | 2.228            | 2.21             | 2.202            | 0.0114    |                                 |  |
|                                       | WA 2θ (d <sub>100</sub> )                | 2.208            |                  |                  |                  |           |                                 |  |
|                                       | d spacing<br>Experimental                | 40.02            | 22.88            | 19.97            | 15.16            |           |                                 |  |
|                                       | d spacing Calculated<br>d <sub>100</sub> | 40.02            | 39.63            | 39.94            | 40.11            | 0.2087    |                                 |  |
|                                       | WA d <sub>100</sub>                      | 39.98            |                  |                  |                  |           |                                 |  |
|                                       | Intensity (cps)                          | 4550             | 573              | 381              | 130              |           |                                 |  |
| (4 months aging)                      | 2θ Experimental                          | 2.384            | 4.065            | 4.675            | 6.13             |           | 43.44                           |  |
|                                       | 2θ (d <sub>100</sub> ) Calculated        | 2.384            | 2.347            | 2.337            | 2.317            | 0.0281    |                                 |  |
|                                       | WA 2θ (d <sub>100</sub> )                | 2.378            |                  |                  |                  |           |                                 |  |
|                                       | d spacing<br>Experimental                | 37.03            | 21.72            | 18.89            | 14.41            |           |                                 |  |
|                                       | d spacing Calculated<br>d <sub>100</sub> | 37.03            | 37.62            | 37.78            | 38.12            | 0.4574    |                                 |  |
|                                       | WA d <sub>100</sub>                      | 37.13            |                  |                  |                  |           |                                 |  |
|                                       | Intensity (cps)                          | 2969             | 260              | 180              | 50               |           |                                 |  |
| (6 months aging)                      | 2θ Experimental                          | 2.327            | 4.021            | 4.630            | 6.109            |           | 43.79                           |  |
|                                       | 2θ (d <sub>100</sub> ) Calculated        | 2.327            | 2.321            | 2.315            | 2.309            | 0.0078    |                                 |  |
|                                       | WA 2θ (d <sub>100</sub> )                | 2.325            |                  |                  |                  |           |                                 |  |
|                                       | d spacing<br>Experimental                | 37.93            | 21.96            | 19.07            | 14.46            |           |                                 |  |
|                                       | d spacing Calculated<br>d <sub>100</sub> | 37.93            | 38.03            | 38.14            | 38.26            | 0.1404    |                                 |  |
|                                       | WA d <sub>100</sub>                      | 37.96            |                  |                  |                  |           |                                 |  |
|                                       | Intensity (cps)                          | 2984             | 394              | 256              | 75               |           |                                 |  |
| (8 months aging)                      | 2θ Experimental                          | 2.298            | 4.021            | 4.626            | 6.066            |           | 44.35                           |  |
|                                       | 2θ (d <sub>100</sub> ) Calculated        | 2.298            | 2.321            | 2.313            | 2.293            | 0.0133    |                                 |  |
|                                       | WA 2θ (d <sub>100</sub> )                | 2.30118          |                  |                  |                  |           |                                 |  |
|                                       | d spacing<br>Experimental                | 38.41            | 21.96            | 19.09            | 14.56            |           |                                 |  |
|                                       | d spacing Calculated<br>d <sub>100</sub> | 38.41            | 38.03            | 38.18            | 38.52            | 0.2198    |                                 |  |
|                                       | WA d <sub>100</sub>                      | 38.36049         |                  |                  |                  |           |                                 |  |
|                                       | Intensity (cps)                          | 2499             | 299              | 197              | 55               |           |                                 |  |
| (10 months aging)                     | 2θ Experimental                          | 2.344            | 4.051            | 4.665            | 6.11             |           | 43.48                           |  |
|                                       | 2θ (d <sub>100</sub> ) Calculated        | 2.344            | 2.339            | 2.332            | 2.309            | 0.0153    |                                 |  |

|                   |                                    |          |       |       |       |        |       |
|-------------------|------------------------------------|----------|-------|-------|-------|--------|-------|
|                   | WA $2\theta$ ( $d_{100}$ )         | 2.342219 |       |       |       |        |       |
|                   | d spacing<br>Experimental          | 37.66    | 21.8  | 18.93 | 14.44 |        |       |
|                   | d spacing Calculated<br>$d_{100}$  | 37.66    | 37.76 | 37.86 | 38.20 | 0.2370 |       |
|                   | WA $d_{100}$                       | 37.69089 |       |       |       |        |       |
|                   | Intensity (cps)                    | 2358     | 279   | 173   | 48    | 2358   |       |
| (12 months aging) | $2\theta$ Experimental             | 2.328    | 4.051 | 4.641 | 6.097 |        | 43.78 |
|                   | $2\theta$ ( $d_{100}$ ) Calculated | 2.328    | 2.339 | 2.320 | 2.304 | 0.0144 |       |
|                   | WA $2\theta$ ( $d_{100}$ )         | 2.328228 |       |       |       |        |       |
|                   | d spacing<br>Experimental          | 37.92    | 21.79 | 19.03 | 14.48 |        |       |
|                   | d spacing Calculated<br>$d_{100}$  | 37.92    | 37.74 | 38.06 | 38.31 | 0.2401 |       |
|                   | WA $d_{100}$                       | 37.91755 |       |       |       |        |       |
|                   | Intensity (cps)                    | 2608     | 382   | 251   | 64    |        |       |

XRD conditions:  $2\theta = 1-7^\circ$ , scan speed = 0.25, sampling width = 0.02, kV = 30, mA = 15, WA = weighted average value.
